# Supplementary material
Source: publisher site journal article supplement (https://www.spandidos-publications.com/5507/downloadSupplementary)

Figure S1. Screening criteria for BLCA-associated high-throughput sequencing data from GEO and TCGA. BLCA, bladder urothelial carcinoma; GEO, Gene Expression Omnibus; TCGA, The Cancer Genome Atlas; CCNB1, cyclin B1.

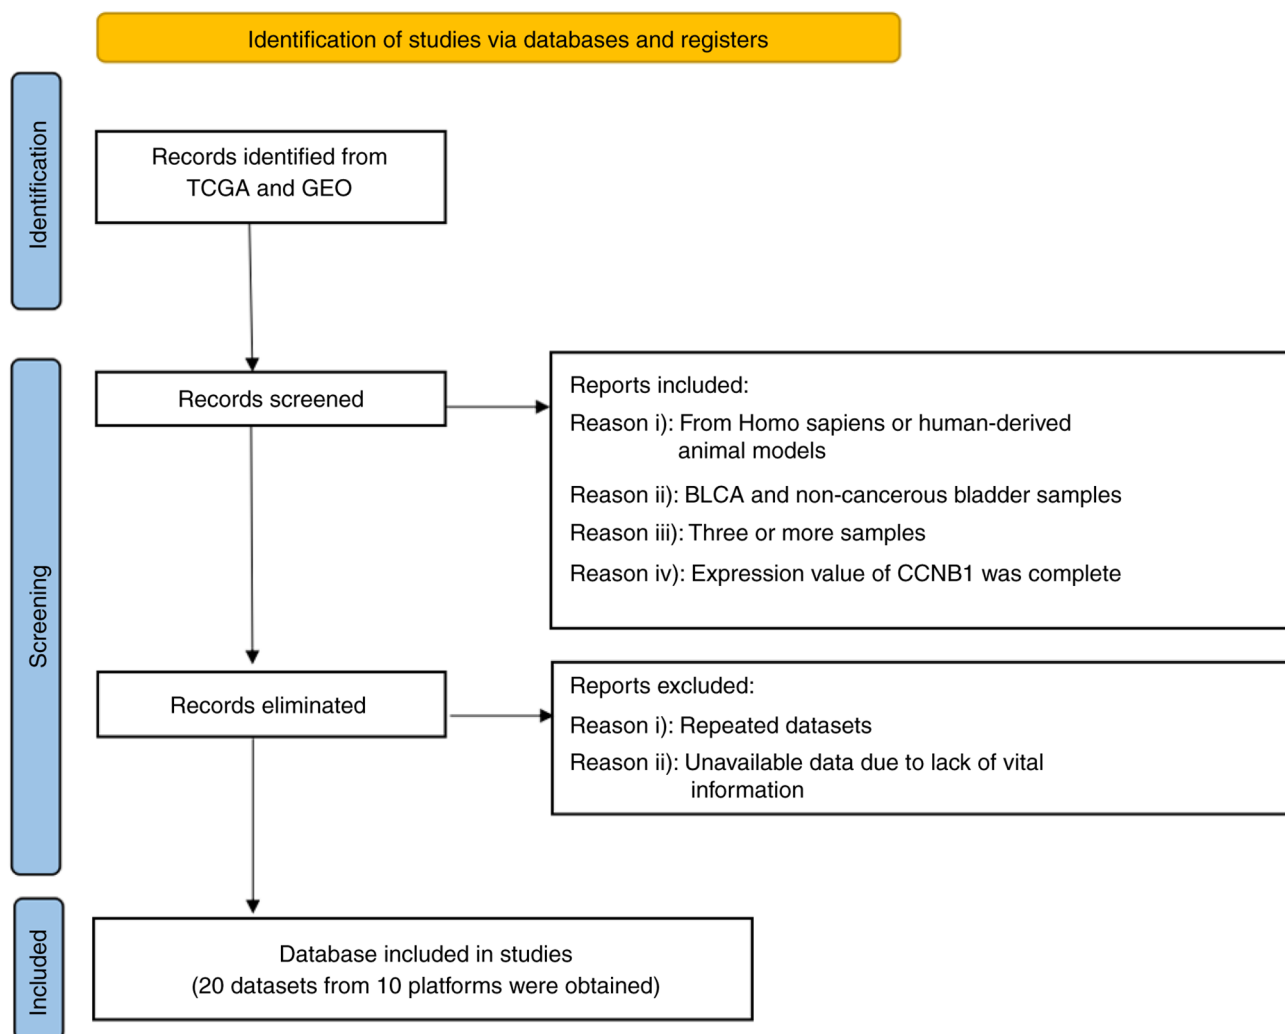

Supplement: Supplementary file 1 [file downloadSupplementary]
